# Supplementary material for: Long lifetime phosphorescence and X-ray scintillation of chlorobismuthate hybrids incorporating ionic liquid cations
Source: Royal Society of Chemistry journal article supplement (doi:10.1039/d0tc05736c), 2020-12-23
Supplement: d0tc05736c1.pdf [file d0tc05736c1.pdf]

Supporting Information

**Long lifetime phosphorescence and X-ray scintillation of chlorobismuthate hybrids incorporating ionic liquid cations**

Jian-Ce Jin,<sup>a,c</sup> Yang-Peng Lin,<sup>b</sup> Yi-Heng Wu,<sup>a,c</sup> Liao-Kuo Gong,<sup>a</sup> Nan-Nan Shen,<sup>a</sup>  
Ying Song,<sup>d</sup> Wen Ma,<sup>a</sup> Zhi-Zhuan Zhang,<sup>a,b</sup> Ke-Zhao Du\*<sup>b</sup> and Xiao-Ying Huang\*<sup>a</sup>

<sup>a</sup>State Key Laboratory of Structure Chemistry, Fujian Institute of Research on the Structure of Matter, Chinese Academy of Sciences, Fuzhou 350002, China.

<sup>b</sup>College of Chemistry and Materials Science, Fujian Provincial Key Laboratory of Advanced Materials Oriented Chemical Engineering, Fujian Normal University, 32 Shangsang Road, Fuzhou 350007, China.

<sup>c</sup>University of Chinese Academy of Sciences, Beijing, 100049, China.

<sup>d</sup>College of Chemistry and Materials, Nanning Normal University, Nanning, 530001, China.

E-mail: [xyhuang@fjirsm.ac.cn](mailto:xyhuang@fjirsm.ac.cn)

E-mail: [duke@fjnu.edu.cn](mailto:duke@fjnu.edu.cn)

**Table S1** Crystallographic data for compound **1**, **2** at 290 K and 100 K.

| Compound                                                                               | <b>1-290K</b>                                                                   | <b>1-100K</b>                                                    | <b>2-290K</b>                                                    | <b>2-100K</b>                                                    |
|----------------------------------------------------------------------------------------|---------------------------------------------------------------------------------|------------------------------------------------------------------|------------------------------------------------------------------|------------------------------------------------------------------|
| Empirical formula                                                                      | BiCl <sub>4</sub> C <sub>16</sub> H <sub>19</sub> N <sub>4</sub> O <sub>2</sub> | BiCl <sub>4</sub> C <sub>16</sub> H <sub>19</sub> N <sub>4</sub> | BiCl <sub>4</sub> C <sub>17</sub> H <sub>21</sub> N <sub>4</sub> | BiCl <sub>4</sub> C <sub>17</sub> H <sub>21</sub> N <sub>4</sub> |
| Formula Mass                                                                           | 650.13                                                                          | 650.13                                                           | 664.16                                                           | 664.16                                                           |
| Crystal system                                                                         | orthorhombic                                                                    | orthorhombic                                                     | orthorhombic                                                     | orthorhombic                                                     |
| Space group                                                                            | <i>Pca</i> 2 <sub>1</sub>                                                       | <i>Pca</i> 2 <sub>1</sub>                                        | <i>Pbca</i>                                                      | <i>Pbca</i>                                                      |
| <i>a</i> /Å                                                                            | 14.6969(12)                                                                     | 14.4947(7)                                                       | 16.4032(6)                                                       | 16.2874(6)                                                       |
| <i>b</i> /Å                                                                            | 9.1488(9)                                                                       | 9.0474(6)                                                        | 16.4094(6)                                                       | 16.3137(6)                                                       |
| <i>c</i> /Å                                                                            | 16.2644(12)                                                                     | 16.1935(7)                                                       | 17.3812(7)                                                       | 17.1361(7)                                                       |
| <i>V</i> /Å <sup>3</sup>                                                               | 2186.9(3)                                                                       | 2123.6(2)                                                        | 4678.4(3)                                                        | 4553.2(3)                                                        |
| <i>Z</i>                                                                               | 4                                                                               | 4                                                                | 8                                                                | 8                                                                |
| <i>T</i> /K                                                                            | 290(2)                                                                          | 100(2)                                                           | 290(2)                                                           | 100(2)                                                           |
| $\lambda$ /Å                                                                           | 0.71073                                                                         | 0.71073                                                          | 0.71073                                                          | 0.71073                                                          |
| <i>F</i> (000)                                                                         | 1240                                                                            | 1240                                                             | 2544                                                             | 2544                                                             |
| $\rho_{\text{calcd}}$ /g cm <sup>-3</sup>                                              | 1.975                                                                           | 2.033                                                            | 1.886                                                            | 1.938                                                            |
| $\mu$ /mm <sup>-1</sup>                                                                | 8.569                                                                           | 8.825                                                            | 8.014                                                            | 8.234                                                            |
| Measured refls.                                                                        | 14023                                                                           | 18014                                                            | 85265                                                            | 69454                                                            |
| Independent refls.                                                                     | 5575                                                                            | 6679                                                             | 6753                                                             | 4013                                                             |
| No. of parameters                                                                      | 284                                                                             | 247                                                              | 256                                                              | 256                                                              |
| <i>R</i> <sub>int</sub>                                                                | 0.0364                                                                          | 0.0440                                                           | 0.0582                                                           | 0.0575                                                           |
| <i>R</i> <sub>1</sub> ( <i>I</i> > 2 $\sigma$ ( <i>I</i> )) <sup>a</sup>               | 0.0355                                                                          | 0.0371                                                           | 0.0276                                                           | 0.0205                                                           |
| <i>wR</i> ( <i>F</i> <sup>2</sup> ) ( <i>I</i> > 2 $\sigma$ ( <i>I</i> )) <sup>b</sup> | 0.0637                                                                          | 0.0698                                                           | 0.0536                                                           | 0.0494                                                           |
| GOF                                                                                    | 1.003                                                                           | 1.006                                                            | 1.024                                                            | 1.015                                                            |

$$[\text{a}] R_1 = \sum \|F_o\| - \|F_c\| / \sum \|F_o\|, [\text{b}] wR_2 = [ \sum w(F_o^2 - F_c^2)^2 / \sum w(F_o^2)^2 ]^{1/2}.$$

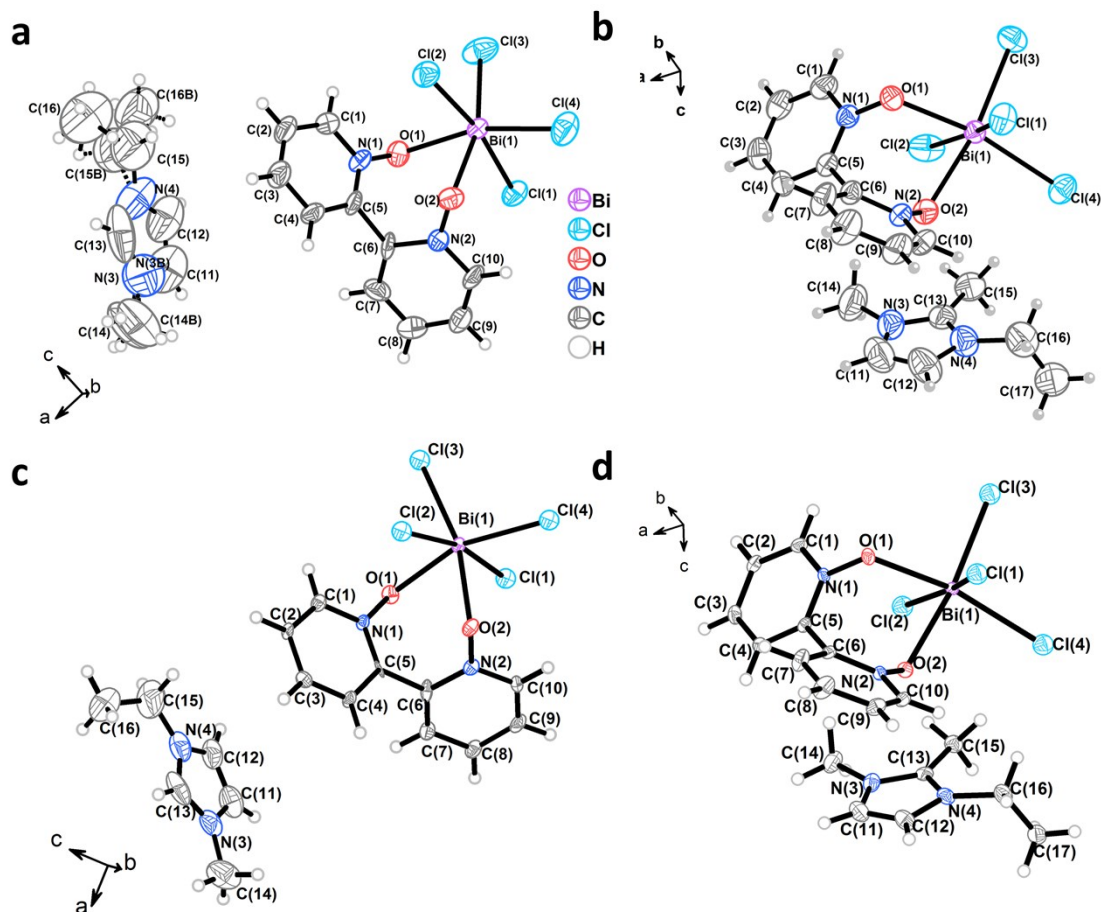

**Fig. S1** ORTEP drawings (50% ellipsoid probability) of the asymmetric units of **1** at 290 K (a), at 100 K (c) and **2** at 290 K (b) and 100 K (d).

**Table S2** Selected bond lengths (Å) and bond angles (°) for **1** and **2** at 290K and 100 K.

| <b>1 (290K)</b>  |           | <b>1 (100K)</b>  |           |
|------------------|-----------|------------------|-----------|
| Bi(1)–O(1)       | 2.405(7)  | Bi(1)–O(1)       | 2.375(6)  |
| Bi(1)–O(2)       | 2.389(8)  | Bi(1)–O(2)       | 2.366(6)  |
| Bi(1)–Cl(1)      | 2.650(3)  | Bi(1)–Cl(1)      | 2.659(3)  |
| Bi(1)–Cl(2)      | 2.690(3)  | Bi(1)–Cl(2)      | 2.676(3)  |
| Bi(1)–Cl(3)      | 2.694(4)  | Bi(1)–Cl(3)      | 2.718(3)  |
| Bi(1)–Cl(4)      | 2.704(4)  | Bi(1)–Cl(4)      | 2.722(3)  |
| O(1)–N(1)        | 1.309(11) | O(1)–N(1)        | 1.333(9)  |
| O(2)–N(2)        | 1.344(12) | O(2)–N(2)        | 1.343(9)  |
| N(3)–C(14)       | 1.434(13) | N(3)–C(14)       | 1.47(2)   |
| N(4)–C(15)       | 1.424(12) | N(4)–C(15)       | 1.47(2)   |
| C(15)–C(16)      | 1.44(2)   | C(15)–C(16)      | 1.41(2)   |
| N(4)–C(15B)      | 1.422(13) |                  |           |
| C(15B)–C(16B)    | 1.48(3)   |                  |           |
| O(2)–Bi(1)–O(1)  | 74.7(2)   | O(2)–Bi(1)–O(1)  | 75.52(17) |
| O(1)–Bi(1)–Cl(1) | 83.52(19) | O(1)–Bi(1)–Cl(1) | 81.97(15) |
| O(1)–Bi(1)–Cl(2) | 87.9(2)   | O(1)–Bi(1)–Cl(2) | 87.84(17) |

|                    |            |
|--------------------|------------|
| O(1)–Bi(1)–Cl(3)   | 89.2(2)    |
| O(1)–Bi(1)–Cl(4)   | 162.2(2)   |
| O(2)–Bi(1)–Cl(1)   | 88.7(2)    |
| O(2)–Bi(1)–Cl(2)   | 83.6(2)    |
| O(2)–Bi(1)–Cl(3)   | 163.5(2)   |
| O(2)–Bi(1)–Cl(4)   | 88.1(2)    |
| Cl(1)–Bi(1)–Cl(2)  | 169.70(7)  |
| Cl(1)–Bi(1)–Cl(3)  | 93.35(10)  |
| Cl(1)–Bi(1)–Cl(4)  | 91.48(12)  |
| Cl(2)–Bi(1)–Cl(3)  | 92.23(12)  |
| Cl(2)–Bi(1)–Cl(4)  | 95.00(10)  |
| Cl(3)–Bi(1)–Cl(4)  | 108.22(12) |
| N(1)–O(1)–Bi(1)    | 118.4(6)   |
| N(2)–O(2)–Bi(1)    | 115.5(6)   |
| C(5)–N(1)–O(1)     | 121.8(12)  |
| O(1)–N(1)–C(1)     | 119.4(10)  |
| O(2)–N(2)–C(10)    | 119.2(10)  |
| O(2)–N(2)–C(6)     | 118.0(13)  |
| C(5)–N(1)–C(1)     | 118.8(13)  |
| C(10)–N(2)–C(6)    | 122.6(14)  |
| N(4)–C(15)–C(16)   | 125(3)     |
| N(4)–C(15B)–C(16B) | 121(3)     |

**2 (290K)**

|             |            |
|-------------|------------|
| Bi(1)–O(1)  | 2.419(3)   |
| Bi(1)–O(2)  | 2.406(3)   |
| Bi(1)–Cl(1) | 2.6599(10) |
| Bi(1)–Cl(2) | 2.6908(11) |
| Bi(1)–Cl(3) | 2.6683(10) |
| Bi(1)–Cl(4) | 2.6551(10) |
| O(1)–N(1)   | 1.331(4)   |
| O(2)–N(2)   | 1.329(4)   |
| N(3)–C(14)  | 1.461(6)   |
| N(4)–C(16)  | 1.493(6)   |
| C(13)–C(15) | 1.465(6)   |
| C(16)–C(17) | 1.464(8)   |

|                  |           |
|------------------|-----------|
| O(2)–Bi(1)–O(1)  | 76.17(8)  |
| O(1)–Bi(1)–Cl(1) | 79.51(6)  |
| O(1)–Bi(1)–Cl(2) | 89.52(7)  |
| O(1)–Bi(1)–Cl(3) | 97.10(7)  |
| O(1)–Bi(1)–Cl(4) | 162.92(7) |
| O(2)–Bi(1)–Cl(1) | 90.88(7)  |
| O(2)–Bi(1)–Cl(2) | 80.72(7)  |
| O(2)–Bi(1)–Cl(3) | 168.61(7) |

|                   |            |
|-------------------|------------|
| O(1)–Bi(1)–Cl(3)  | 89.91(17)  |
| O(1)–Bi(1)–Cl(4)  | 160.77(18) |
| O(2)–Bi(1)–Cl(1)  | 88.00(17)  |
| O(2)–Bi(1)–Cl(2)  | 82.61(15)  |
| O(2)–Bi(1)–Cl(3)  | 164.82(18) |
| O(2)–Bi(1)–Cl(4)  | 86.06(17)  |
| Cl(1)–Bi(1)–Cl(2) | 167.61(5)  |
| Cl(1)–Bi(1)–Cl(3) | 94.25(7)   |
| Cl(1)–Bi(1)–Cl(4) | 92.05(11)  |
| Cl(2)–Bi(1)–Cl(3) | 92.76(11)  |
| Cl(2)–Bi(1)–Cl(4) | 95.34(7)   |
| Cl(3)–Bi(1)–Cl(4) | 108.83(9)  |
| N(1)–O(1)–Bi(1)   | 117.6(5)   |
| N(2)–O(2)–Bi(1)   | 116.7(5)   |
| O(1)–N(1)–C(5)    | 119.6(9)   |
| O(1)–N(1)–C(1)    | 118.8(7)   |
| O(2)–N(2)–C(10)   | 118.9(7)   |
| O(2)–N(2)–C(6)    | 119.8(10)  |
| C(5)–N(1)–C(1)    | 121.6(9)   |
| C(10)–N(2)–C(6)   | 121.2(10)  |
| C(16)–C(15)–N(4)  | 115.6(18)  |

**2 (100K)**

|             |           |
|-------------|-----------|
| Bi(1)–O(1)  | 2.403(2)  |
| Bi(1)–O(2)  | 2.388(2)  |
| Bi(1)–Cl(1) | 2.6617(9) |
| Bi(1)–Cl(2) | 2.6987(9) |
| Bi(1)–Cl(3) | 2.6831(9) |
| Bi(1)–Cl(4) | 2.6679(9) |
| O(1)–N(1)   | 1.341(4)  |
| O(2)–N(2)   | 1.332(4)  |
| N(3)–C(14)  | 1.464(5)  |
| N(4)–C(16)  | 1.470(5)  |
| C(13)–C(15) | 1.476(5)  |
| C(16)–C(17) | 1.507(6)  |

|                  |           |
|------------------|-----------|
| O(2)–Bi(1)–O(1)  | 76.91(8)  |
| O(1)–Bi(1)–Cl(1) | 78.47(6)  |
| O(1)–Bi(1)–Cl(2) | 88.80(6)  |
| O(1)–Bi(1)–Cl(3) | 98.00(6)  |
| O(1)–Bi(1)–Cl(4) | 162.37(6) |
| O(2)–Bi(1)–Cl(1) | 91.11(6)  |
| O(2)–Bi(1)–Cl(2) | 80.04(6)  |
| O(2)–Bi(1)–Cl(3) | 168.95(6) |

|                   |            |                   |            |
|-------------------|------------|-------------------|------------|
| O(2)–Bi(1)–Cl(4)  | 90.81(6)   | O(2)–Bi(1)–Cl(4)  | 90.06(6)   |
| Cl(1)–Bi(1)–Cl(2) | 167.55(4)  | Cl(1)–Bi(1)–Cl(2) | 165.92(3)  |
| Cl(1)–Bi(1)–Cl(3) | 96.98(3)   | Cl(1)–Bi(1)–Cl(3) | 97.52(3)   |
| Cl(3)–Bi(1)–Cl(2) | 90.15(3)   | Cl(3)–Bi(1)–Cl(2) | 90.13(3)   |
| Cl(4)–Bi(1)–Cl(1) | 89.85(3)   | Cl(1)–Bi(1)–Cl(4) | 90.12(3)   |
| Cl(4)–Bi(1)–Cl(2) | 99.37(4)   | Cl(4)–Bi(1)–Cl(2) | 100.74(3)  |
| Cl(4)–Bi(1)–Cl(3) | 97.42(3)   | Cl(4)–Bi(1)–Cl(3) | 96.78(3)   |
| N(1)–O(1)–Bi(1)   | 115.61(19) | N(1)–O(1)–Bi(1)   | 115.31(19) |
| N(2)–O(2)–Bi(1)   | 118.7(2)   | N(2)–O(2)–Bi(1)   | 118.4(2)   |
| O(1)–N(1)–C(1)    | 119.6(3)   | O(1)–N(1)–C(1)    | 119.3(3)   |
| O(1)–N(1)–C(5)    | 119.5(3)   | O(1)–N(1)–C(5)    | 119.2(3)   |
| O(2)–N(2)–C(6)    | 119.5(3)   | O(2)–N(2)–C(6)    | 119.4(3)   |
| O(2)–N(2)–C(10)   | 119.8(3)   | O(2)–N(2)–C(10)   | 119.2(3)   |
| C(1)–N(1)–C(5)    | 120.8(3)   | C(1)–N(1)–C(5)    | 121.5(3)   |
| C(10)–N(2)–C(6)   | 120.7(3)   | C(10)–N(2)–C(6)   | 121.4(3)   |
| C(17)–C(16)–N(4)  | 110.4(5)   | N(4)–C(16)–C(17)  | 112.8(3)   |

**Table S3** Hydrogen bonding data for **1** and **2** at 290K and 100K.

| D–H···A                                                                                                                               | D–H (Å) | H···A (Å) | D···A (Å) | <(DHA) (°) |
|---------------------------------------------------------------------------------------------------------------------------------------|---------|-----------|-----------|------------|
| <b>1-290 K</b>                                                                                                                        |         |           |           |            |
| <b>H-bond in anions</b>                                                                                                               |         |           |           |            |
| C(1)–H(1A)···Cl(1)#1                                                                                                                  | 0.93    | 2.87      | 3.507(13) | 126.6      |
| C(2)–H(2A)···Cl(1)#1                                                                                                                  | 0.93    | 2.94      | 3.53(3)   | 123.3      |
| C(2)–H(2A)···Cl(4)#1                                                                                                                  | 0.93    | 2.90      | 3.70(3)   | 145.0      |
| C(4)–H(4A)···Cl(4)#2                                                                                                                  | 0.93    | 2.90      | 3.624(12) | 135.8      |
| C(7)–H(7A)···Cl(1)#3                                                                                                                  | 0.93    | 2.96      | 3.614(11) | 128.9      |
| C(7)–H(7A)···Cl(3)#3                                                                                                                  | 0.93    | 2.83      | 3.588(14) | 139.5      |
| C(9)–H(9A)···Cl(3)#4                                                                                                                  | 0.93    | 2.79      | 3.64(3)   | 152.5      |
| C(10)–H(10A)···Cl(2)#4                                                                                                                | 0.93    | 2.83      | 3.501(11) | 129.8      |
| <b>H-bonds between anions and cations</b>                                                                                             |         |           |           |            |
| C(11)–H(11A)···O(1)#3                                                                                                                 | 0.93    | 2.58      | 3.393(19) | 146.0      |
| C(13)–H(13A)···Cl(4)#5                                                                                                                | 0.93    | 2.80      | 3.71(2)   | 166.0      |
| C(14 <sup>a</sup> )–H(14B <sup>a</sup> )···Cl(3)#6                                                                                    | 0.96    | 2.66      | 3.60(6)   | 166.9      |
| C(16 <sup>a</sup> )–H(16C <sup>a</sup> )···O(2)#5                                                                                     | 0.96    | 2.54      | 3.40(3)   | 149.3      |
| C(14B <sup>b</sup> )–H(14E <sup>b</sup> )···Cl(3)#6                                                                                   | 0.96    | 2.90      | 3.85(13)  | 172.7      |
| C(15B <sup>b</sup> )–H(15D <sup>b</sup> )···Cl(1)#7                                                                                   | 0.97    | 2.69      | 3.36(9)   | 126.4      |
| Symmetry transformations used to generate equivalent atoms:                                                                           |         |           |           |            |
| #1 -x+1/2, y, z+1/2; #2 x+1/2, -y+1, z; #3 x+1/2, -y, z; #4 -x+1/2, y, z-1/2; #5 -x+1, -y+1, z+1/2; #6 x+1, y, z; #7 -x+1, -y, z+1/2. |         |           |           |            |
| <b>1-100 K</b>                                                                                                                        |         |           |           |            |
| <b>H-bond in anions</b>                                                                                                               |         |           |           |            |
| C(1)–H(1A)···Cl(1)#1                                                                                                                  | 0.95    | 2.83      | 3.460(9)  | 124.9      |
| C(2)–H(2A)···Cl(1)#1                                                                                                                  | 0.95    | 2.86      | 3.467(15) | 122.5      |
| C(2)–H(2A)···Cl(4)#1                                                                                                                  | 0.95    | 2.79      | 3.597(14) | 142.9      |

|                        |      |      |           |       |
|------------------------|------|------|-----------|-------|
| C(4)–H(4A)···Cl(2)#2   | 0.95 | 2.97 | 3.571(9)  | 122.8 |
| C(4)–H(4A)···Cl(4)#2   | 0.95 | 2.87 | 3.607(9)  | 135.7 |
| C(7)–H(7A)···Cl(1)#3   | 0.95 | 2.90 | 3.548(10) | 126.3 |
| C(7)–H(7A)···Cl(3)#3   | 0.95 | 2.81 | 3.554(9)  | 135.4 |
| C(9)–H(9A)···Cl(2)#4   | 0.95 | 2.95 | 3.550(16) | 122.2 |
| C(9)–H(9A)···Cl(3)#4   | 0.95 | 2.75 | 3.610(17) | 151.0 |
| C(10)–H(10A)···Cl(2)#4 | 0.95 | 2.82 | 3.481(9)  | 127.6 |

**H-bonds between anions and cations**

|                        |      |      |           |       |
|------------------------|------|------|-----------|-------|
| C(11)–H(11A)···O(1)#3  | 0.95 | 2.64 | 3.435(15) | 141.2 |
| C(12)–H(12A)···Cl(3)#3 | 0.95 | 2.97 | 3.726(14) | 137.6 |
| C(13)–H(13A)···Cl(4)#5 | 0.95 | 2.80 | 3.694(15) | 157.5 |
| C(14)–H(14B)···Cl(2)#2 | 0.98 | 2.80 | 3.499(14) | 129.0 |
| C(14)–H(14C)···Cl(3)#6 | 0.98 | 2.81 | 3.784(15) | 172.8 |
| C(15)–H(15A)···Cl(4)#1 | 0.99 | 2.85 | 3.800(17) | 160.2 |
| C(16)–H(16C)···O(2)#5  | 0.98 | 2.40 | 3.361(13) | 165.0 |

Symmetry transformations used to generate equivalent atoms:

#1  $-x+1/2, y, z+1/2$ ; #2  $x+1/2, -y+1, z$ ; #3  $x+1/2, -y, z$ ; #4  $-x+1/2, y, z-1/2$ ; #5  $-x+1, -y+1, z+1/2$ ;  
#6  $x+1, y, z$ .

**2-290 K**

**H-bonds in anion**

|                     |      |      |          |       |
|---------------------|------|------|----------|-------|
| C(2)–H(2)···Cl(1)#1 | 0.93 | 2.97 | 3.639(4) | 130.5 |
| C(2)–H(2)···Cl(4)#1 | 0.93 | 2.74 | 3.559(4) | 147.3 |
| C(4)–H(4)···Cl(4)#2 | 0.93 | 2.83 | 3.460(4) | 125.6 |
| C(7)–H(7)···Cl(3)#3 | 0.93 | 2.76 | 3.582(4) | 148.3 |
| C(9)–H(9)···Cl(2)#4 | 0.93 | 2.93 | 3.542(4) | 124.3 |
| C(9)–H(9)···Cl(3)#4 | 0.93 | 2.74 | 3.585(4) | 151.8 |

**H-bonds between anions and cations**

|                        |      |      |          |       |
|------------------------|------|------|----------|-------|
| C(14)–H(14B)···Cl(4)#2 | 0.96 | 2.79 | 3.629(6) | 146.4 |
| C(14)–H(14C)···O(1)#5  | 0.96 | 2.52 | 3.260(7) | 133.6 |
| C(15)–H(15A)···Cl(4)   | 0.96 | 2.80 | 3.761(5) | 179.0 |
| C(15)–H(15C)···Cl(3)#5 | 0.96 | 2.80 | 3.752(5) | 171.0 |
| C(16)–H(16B)···Cl(2)#4 | 0.97 | 2.92 | 3.840(6) | 158.4 |
| C(17)–H(17C)···Cl(1)#6 | 0.96 | 2.87 | 3.811(6) | 168.7 |

Symmetry transformations used to generate equivalent atoms:

#1  $-x+1/2, y+1/2, z$ ; #2  $x+1/2, -y+3/2, -z+1$ ; #3  $x+1/2, y, -z+1/2$ ; #4  $-x+1/2, y-1/2, z$ ; #5  $x, -y+3/2, z+1/2$ ; #6  $-x+1/2, -y+1, z+1/2$ .

**2-100 K**

**H-bonds in anion**

|                     |      |      |          |       |
|---------------------|------|------|----------|-------|
| C(2)–H(2)···Cl(1)#1 | 0.95 | 2.88 | 3.583(4) | 131.3 |
| C(2)–H(2)···Cl(4)#1 | 0.95 | 2.69 | 3.501(4) | 143.5 |
| C(4)–H(4)···Cl(4)#2 | 0.95 | 2.78 | 3.409(4) | 124.3 |
| C(7)–H(7)···Cl(3)#3 | 0.95 | 2.72 | 3.540(4) | 145.1 |
| C(9)–H(9)···Cl(2)#4 | 0.95 | 2.86 | 3.477(4) | 123.5 |
| C(9)–H(9)···Cl(3)#4 | 0.95 | 2.69 | 3.541(4) | 149.7 |

|                                           |      |      |          |       |
|-------------------------------------------|------|------|----------|-------|
| C(10)–H(10)···Cl(2)#4                     | 0.95 | 2.97 | 3.530(4) | 119.4 |
| <b>H-bonds between anions and cations</b> |      |      |          |       |
| C(11)–H(11)···Cl(3)#2                     | 0.95 | 2.98 | 3.639(4) | 127.6 |
| C(14)–H(14B)···Cl(4)#2                    | 0.98 | 2.84 | 3.622(4) | 137.3 |
| C(14)–H(14C)···O(1)#5                     | 0.98 | 2.48 | 3.180(5) | 127.8 |
| C(15)–H(15A)···Cl(4)                      | 0.98 | 2.73 | 3.703(4) | 172.2 |
| C(15)–H(15B)···Cl(2)                      | 0.98 | 2.95 | 3.659(4) | 129.9 |
| C(15)–H(15C)···Cl(3)#5                    | 0.98 | 2.77 | 3.731(4) | 166.7 |
| C(16)–H(16A)···Cl(2)#4                    | 0.99 | 2.86 | 3.797(4) | 157.5 |
| C(16)–H(16B)···Cl(4)                      | 0.99 | 2.96 | 3.942(4) | 171.1 |
| C(17)–H(17C)···Cl(1)#6                    | 0.98 | 2.84 | 3.792(4) | 162.9 |

Symmetry transformations used to generate equivalent atoms:

#1  $-x+1/2, y+1/2, z$ ; #2  $x+1/2, -y+3/2, -z+1$ ; #3  $x+1/2, y, -z+1/2$ ; #4  $-x+1/2, y-1/2, z$ ; #5  $x, -y+3/2, z+1/2$ ; #6  $-x+1/2, -y+1, z+1/2$ .

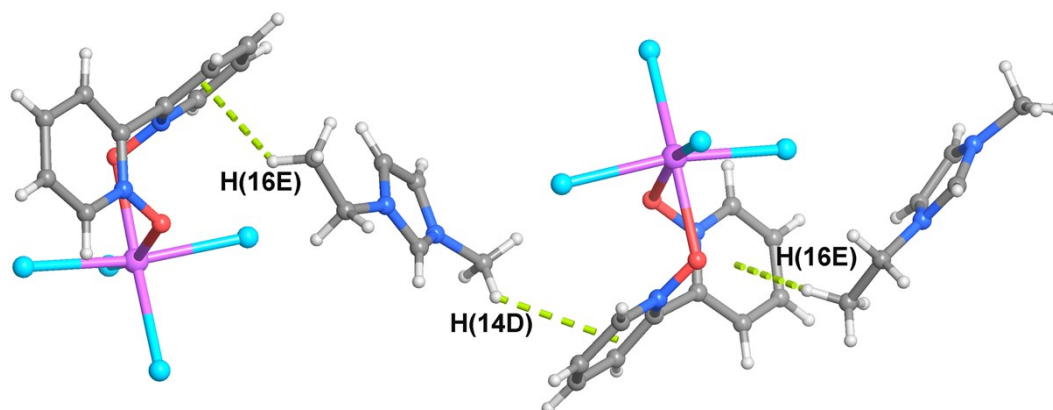

**Fig. S2** The view of C–H··· $\pi$  interactions (lime dotted line) for **1** at 290 K between anions and cations.

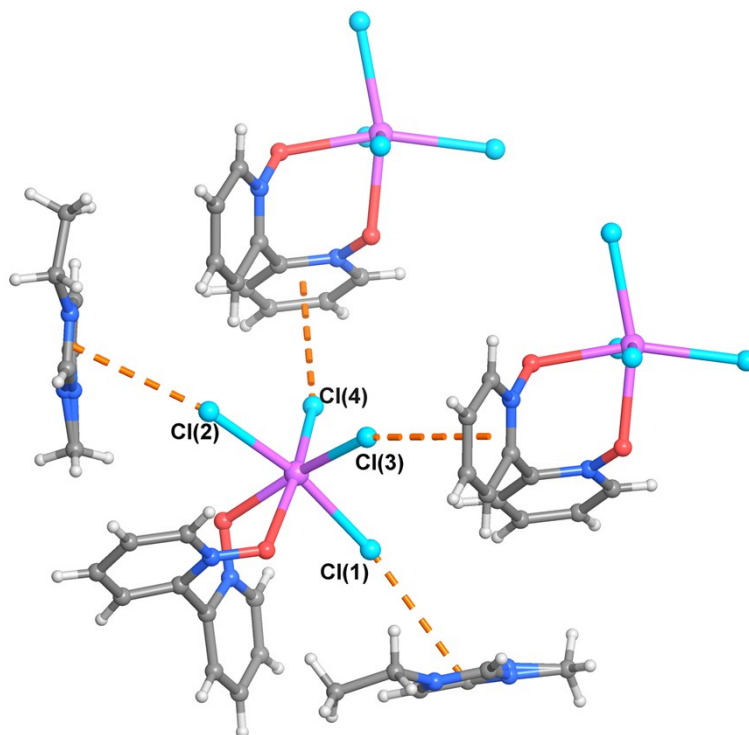

**Fig. S3** The view of anion... $\pi$  interactions (orange dotted line) for **1** at 290 K between anions and cations and between anions and cations.

**Table S4.** Selected weak interaction data for **1** at 290 K.

| Y-X(I)...Cg(J)                               | ARU(J)  | X...Cg(Å) | <Y-X...Cg(°) | Y...Cg(Å) | Y-X, Pi |
|----------------------------------------------|---------|-----------|--------------|-----------|---------|
| <b>C-H...<math>\pi</math> interactions</b>   |         |           |              |           |         |
| C(14B)-H(14D)→Cg(3)                          | 4565.02 | 2.98      | 130          | 3.68(11)  | 61.00   |
| C(16B)-H(16E)→Cg(4)                          | 2655.02 | 2.79      | 129          | 3.48(7)   | 35.00   |
| <b>anion...<math>\pi</math> interactions</b> |         |           |              |           |         |
| Bi(1)-Cl(1)→Cg(1)                            | 2654.01 | 3.723(10) | 162.58(19)   | 6.302(10) | 51.67   |
| Bi(1)-Cl(1)→Cg(2)                            | 2654.01 | 3.755(17) | 162.4(3)     | 6.331(16) | 48.25   |
| Bi(1)-Cl(2)→Cg(1)                            | 4465.01 | 3.631(10) | 153.55(19)   | 6.157(10) | 52.33   |
| Bi(1)-Cl(2)→Cg(2)                            | 4465.01 | 3.599(17) | 153.6(3)     | 6.127(16) | 48.98   |
| Bi(1)-Cl(3)→Cg(3)                            | 4455.02 | 3.662(7)  | 158.98(17)   | 6.252(6)  | 55.71   |
| Bi(1)-Cl(4)→Cg(4)                            | 4465.02 | 3.649(7)  | 159.35(17)   | 6.252(7)  | 55.65   |

Cg(1): N(3)→C(11)→C(12)→N(4)→C(13). Cg(2): N(4)→C(12)→C(11)→N(3B)→C(13). Cg(3): N(1)→C(1)→C(2)→C(3)→C(4)→C(5). Cg(4): N(2)→C(6)→C(7)→C(8)→C(9)→C(10). [4565] = 1/2+x, 1-y, z. [2655] = 1-x, -y, 1/2+z. [2654] = 1-x, -y, -1/2+z. [4465] = -1/2+x, 1-y, z. [4455] = -1/2+x, -y, z. [4465] = -1/2+x, 1-y, z.



Notably, the ethyl chain in [Emim]<sup>+</sup> of **1** follows statistical distribution at 290 K. The disorder in cation for **1** leads to additional weak interactions (Table S4):

- 1) **anion... $\pi$  interactions:** another two anion... $\pi$  interactions exist between Cl atoms (Cl(1) and Cl(2)) and imidazole ring.
- 2) **C-H... $\pi$  interactions:** **1** also possesses additional C-H... $\pi$  interactions with the distance of 2.98 and 2.79 Å between two pyridine rings from anion and the alkyl chain in cation (Fig. S2).

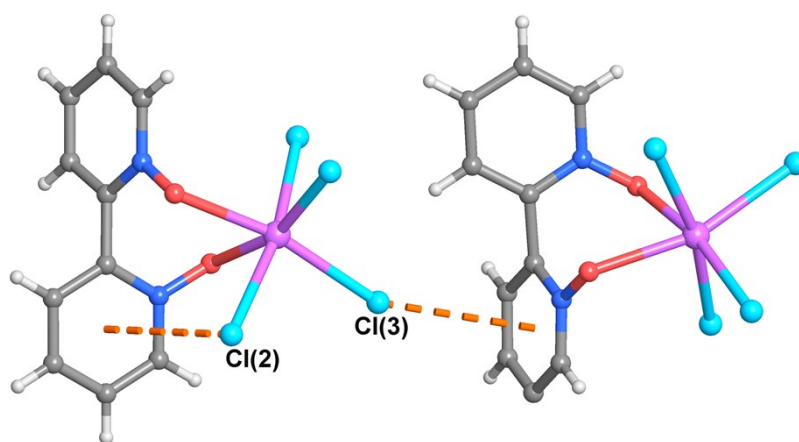

**Fig. S4** The view of anion... $\pi$  interactions (orange dotted line) for **2** at 290 K in the anionic part.

**Table S5.** Selected weak interaction data for **2** at 290 K.

| Y-X(I)...Cg(J)                                                                                                                                                   | ARU(J)  | X...Cg(Å)  | <Y-X...Cg(°) | Y...Cg(Å)  | Y-X, Pi |
|------------------------------------------------------------------------------------------------------------------------------------------------------------------|---------|------------|--------------|------------|---------|
| <b>anion...<math>\pi</math> interactions</b>                                                                                                                     |         |            |              |            |         |
| Bi(1)-Cl(2)→Cg(1)                                                                                                                                                | 1555.01 | 3.741(2)   | 82.62(4)     | 4.3185(16) | 25.03   |
| Bi(1)-Cl(3)→Cg(1)                                                                                                                                                | 6455.01 | 3.5707(19) | 156.38(4)    | 6.1098(16) | 54.57   |
| Cg(1): N(1)→C(1)→C(2)→C(3)→C(4)→C(5). Cg(2): N(2)→C(6)→C(7)→C(8)→C(9)→C(10).<br>Cg(3): N(3)→C(11)→C(12)→N(4)→C(13). [1555] = x, y, z. [6455] = -1/2+x, y, 1/2-z. |         |            |              |            |         |

**Table S6.** Selected weak interaction data for **1** at 100 K.

| Y-X(I)...Cg(J)                                                                                                                                                                                                             | ARU(J)  | X...Cg(Å) | <Y-X...Cg(°) | Y...Cg(Å) | Y-X, Pi |
|----------------------------------------------------------------------------------------------------------------------------------------------------------------------------------------------------------------------------|---------|-----------|--------------|-----------|---------|
| <b>anion...<math>\pi</math> interactions</b>                                                                                                                                                                               |         |           |              |           |         |
| Bi(1)-Cl(1)→Cg(3)                                                                                                                                                                                                          | 2654.02 | 3.557(6)  | 161.09(13)   | 6.133(6)  | 52.96   |
| Bi(1)-Cl(2)→Cg(3)                                                                                                                                                                                                          | 4465.02 | 3.686(6)  | 157.54(13)   | 6.243(6)  | 53.28   |
| Bi(1)-Cl(3)→Cg(1)                                                                                                                                                                                                          | 4455.01 | 3.565(5)  | 157.30(12)   | 6.163(4)  | 55.74   |
| Bi(1)-Cl(4)→Cg(2)                                                                                                                                                                                                          | 4465.01 | 3.553(5)  | 158.17(12)   | 6.164(5)  | 54.65   |
| Cg(1): N(1)→C(1)→C(2)→C(3)→C(4)→C(5). Cg(2): N(2)→C(6)→C(7)→C(8)→C(9)→C(10).<br>Cg(3): N(3)→C(11)→C(12)→N(4)→C(13). [2654] = 1-x, -y, -1/2+z. [4465] = -1/2+x, 1-y, z.<br>[4455] = -1/2+x, -y, z. [4465] = -1/2+x, 1-y, z. |         |           |              |           |         |

**Table S7.** Selected weak interaction data for **2** at 100 K.

| Y–X(I)⋯Cg(J)                               | ARU(J)  | X⋯Cg(Å)    | <Y–X⋯Cg(°) | Y⋯Cg(Å)    | Y–X, Pi |
|--------------------------------------------|---------|------------|------------|------------|---------|
| <b>anion⋯<math>\pi</math> interactions</b> |         |            |            |            |         |
| Bi(1)–Cl(2)→Cg(1)                          | 1555.01 | 3.6689(16) | 83.56(3)   | 4.3037(13) | 24.13   |
| Bi(1)–Cl(3)→Cg(1)                          | 6455.01 | 3.4847(16) | 156.08(4)  | 6.0362(14) | 54.80   |

Cg(1): N(1)→C(1)→C(2)→C(3)→C(4)→C(5). Cg(2): N(2)→C(6)→C(7)→C(8)→C(9)→C(10).  
 Cg(3): N(3)→C(11)→C(12)→N(4)→C(13). [1555] =  $x, y, z$ . [6455] =  $-1/2+x, y, 1/2-z$ .

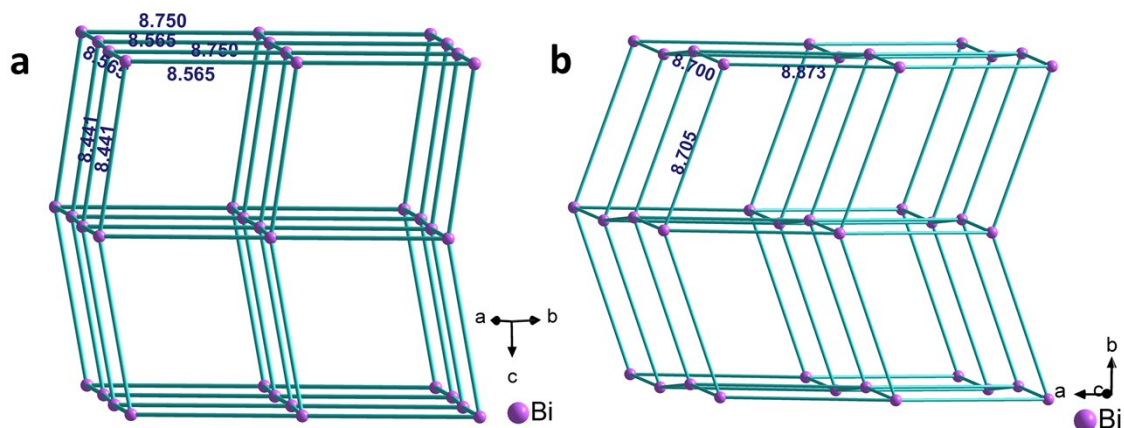

**Fig. S5** Topological structures of **1** (a) and **2** (b) created by linking adjacent Bi atoms. Both compounds exhibit **pcu** topological structure. The distances of adjacent Bi atoms are 8.441, 8.565, 8.750 for **1** and 8.700, 8.705, 8.873 for **2**.

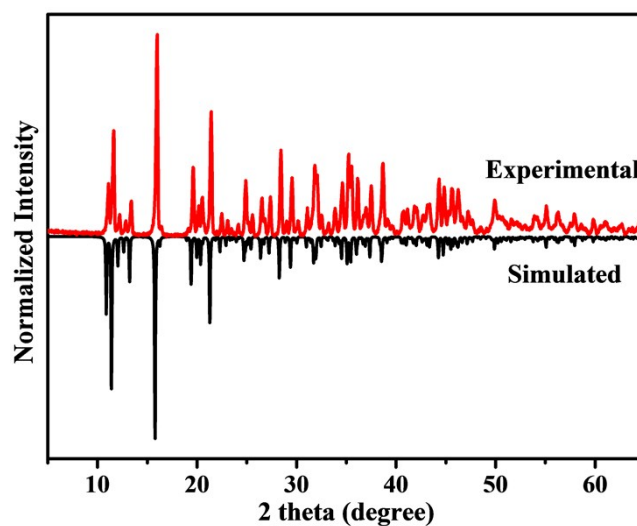

**Fig. S6** PXRD patterns of **1**.

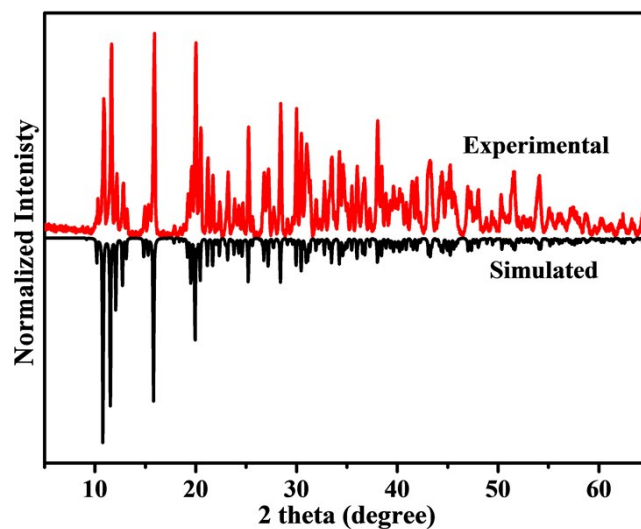

Fig. S7 PXR D patterns of 2.

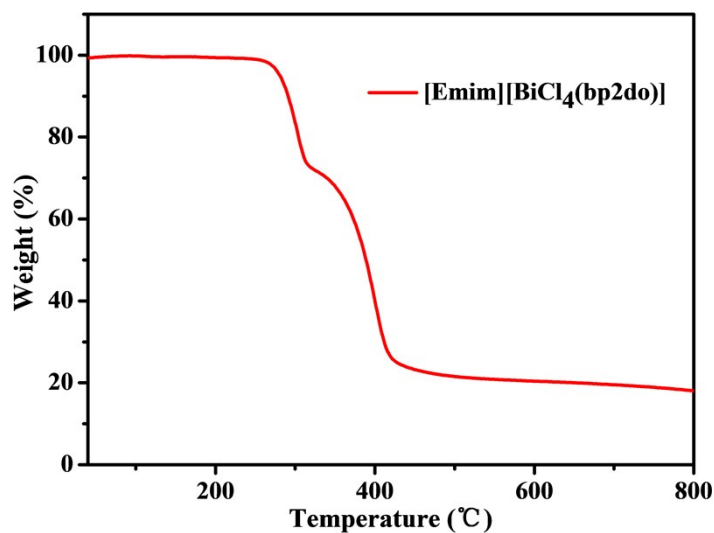

Fig. S8 TG curve of 1.

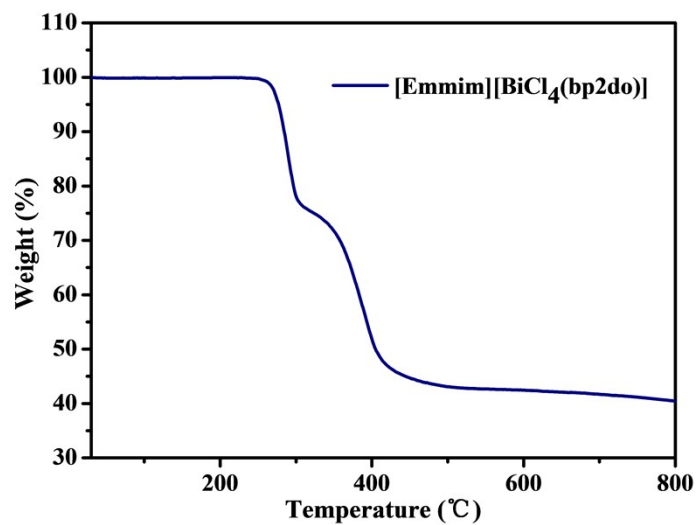

Fig. S9 TG curve of 2.

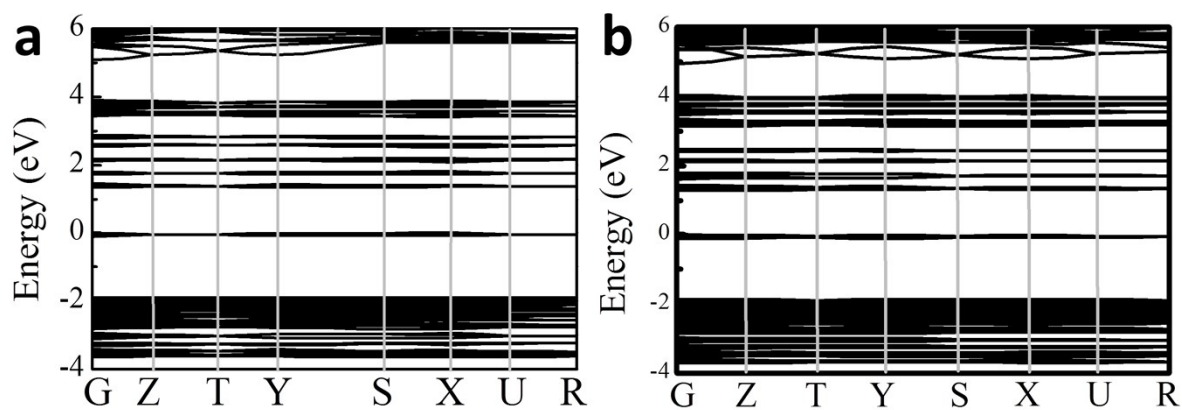

**Fig. S10** The electronic band structure of **1** (a) and **2** (b). The calculated bandgap is 1.332 for **1** and 1.281 eV for **2**.

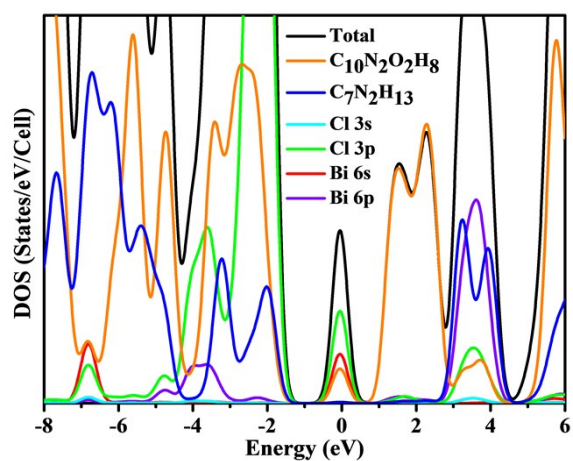

**Fig. S11** Density of states (DOSs) for **2**. The  $C_{10}N_2O_2H_8$  represents the bp2do organic ligand and the  $C_7N_2H_{13}$  represents the  $[Emmim]^+$  cation.

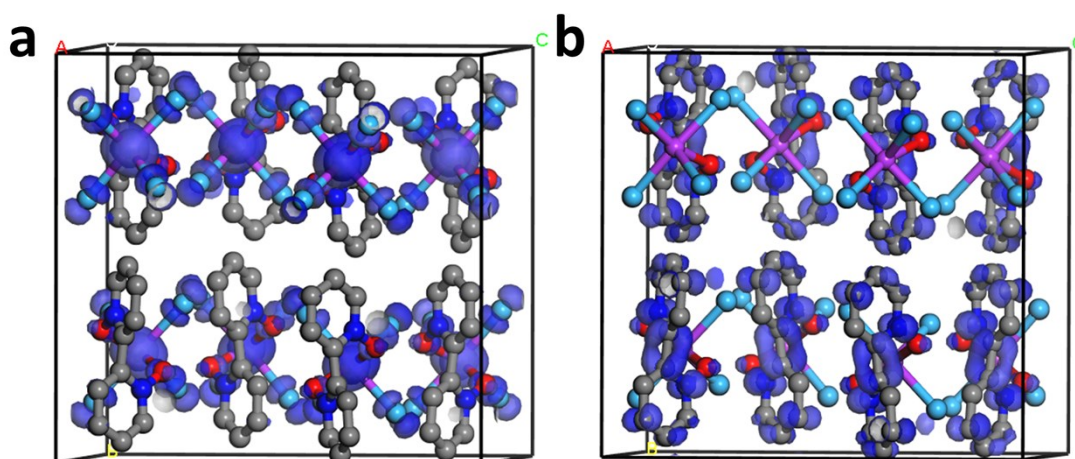

**Fig. S12** The molecular orbitals of **2** showing the highest occupied molecular orbital (a, HOMO) and the lowest occupied molecular orbital (b, LUMO). The isosurface values are 0.02.

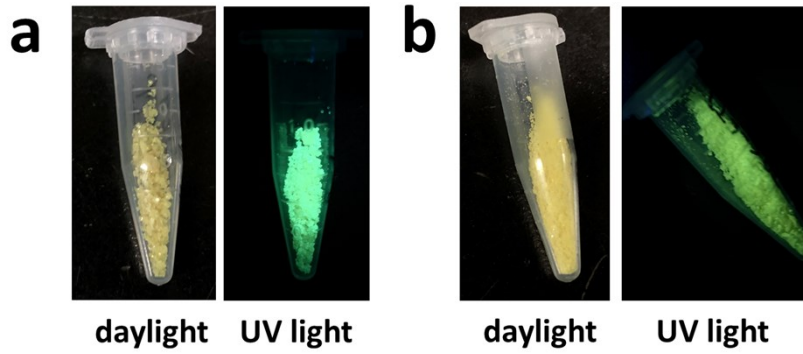

**Fig. S13** (a) Photographs of **1** under daylight (left) and UV light (right). (b) Photographs of **2** under daylight (left) and UV light (right).

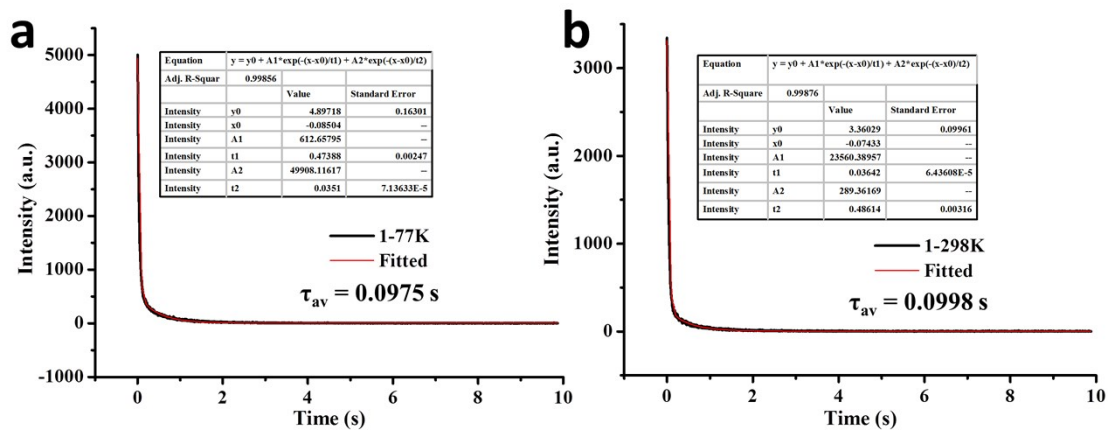

**Fig. S14** PL decay spectra of **1** at 77 K (a) and 298 K (b). The data could be fitted well by bi-exponential function. The average lifetime is 0.0975 s at 77 K ( $\tau_1 = 0.474$  s, 14.20%;  $\tau_2 = 0.0351$  s, 85.80%) and 0.0998 s at 298 K ( $\tau_1 = 0.0364$  s, 85.90%;  $\tau_2 = 0.486$  s, 14.10%), respectively.

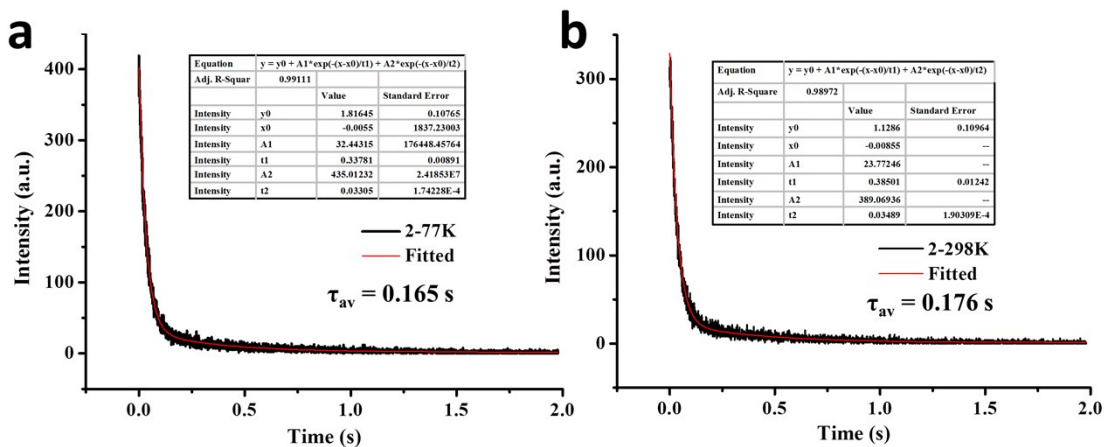

**Fig. S15** PL decay spectra of **2** at 77 K (a) and 298 K (b). The data could be fitted well by bi-exponential function. The average lifetime is 0.165 s at 77 K ( $\tau_1 = 0.338$  s, 43.30%;  $\tau_2 = 0.0331$  s, 56.70%) and 0.176 s at 298 K ( $\tau_1 = 0.385$  s, 40.30%;  $\tau_2 = 0.0349$  s, 59.70%), respectively.

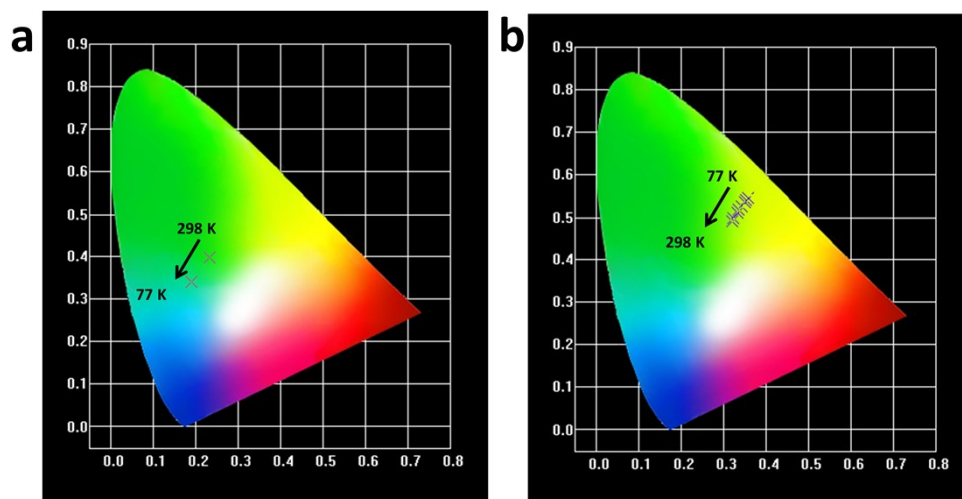

**Fig. S16** The temperature-dependent CIE (1931) chromaticity coordinates of **1** (a) and **2** (b) from 77 K to 298 K.

**Table S8** The distortion of bismuth-chloride/oxygen bonds and angles for **1** and **2** at 290 K and 100 K.

| Compound       | $D$     | $\lambda_{oct}$ | $\sigma^2$ |
|----------------|---------|-----------------|------------|
| <b>1-290 K</b> | 0.04929 | 1.0219          | 63.88      |
| <b>1-100 K</b> | 0.05552 | 1.0246          | 69.64      |
| <b>2-290 K</b> | 0.04414 | 1.0187          | 57.38      |
| <b>2-100 K</b> | 0.04851 | 1.0206          | 62.55      |

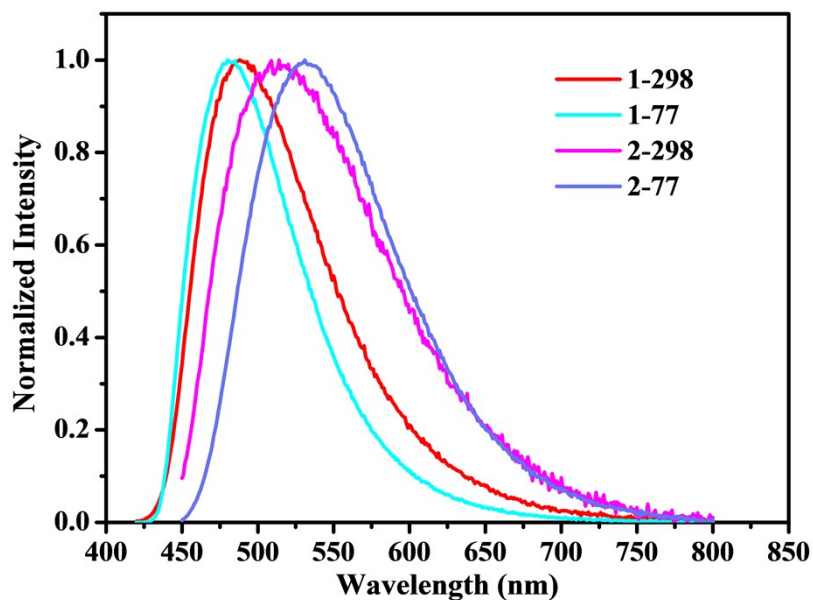

**Fig. S17** Normalized emission spectra of **1** and **2** at 290 K and 77 K. The excitation wavelength is 410 nm for **1** and 430 nm for **2**.

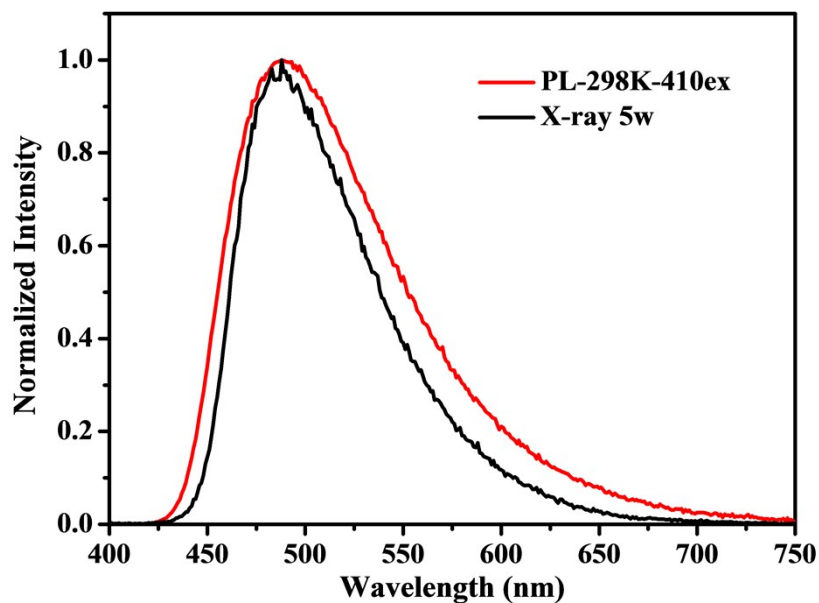

**Fig. S18** Comparison of normalized PL spectra for **1** under different excited resources at RT. The black solid line is under X-ray excitation while the red solid line is under 410 nm UV excitation.

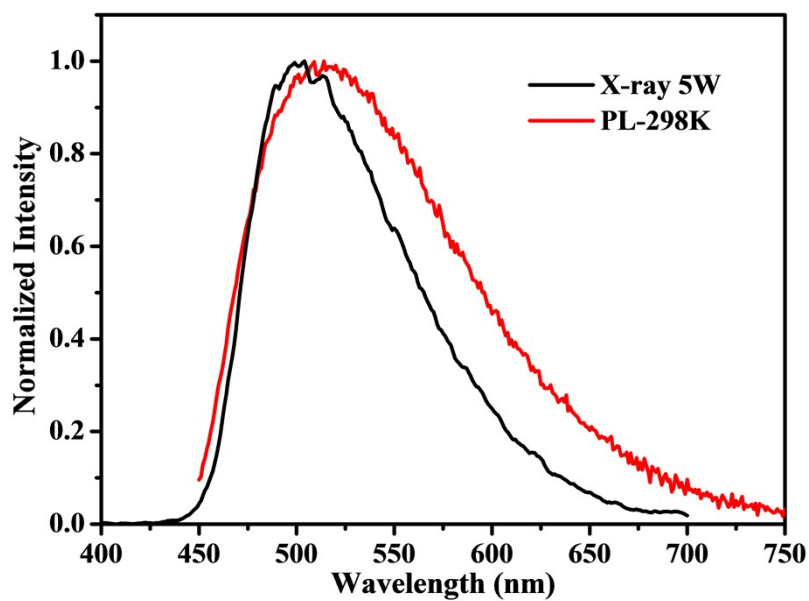

**Fig. S19** Comparison of normalized PL spectra for **2** under different excited resources at RT. The black solid line is under X-ray excitation while the red solid line is under 430 nm UV excitation.

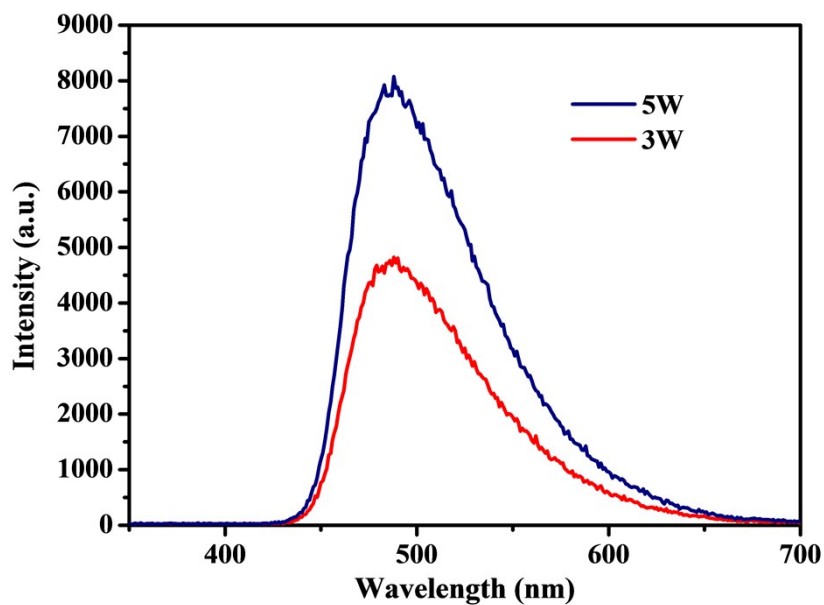

**Fig. S20** X-ray excited PL spectra of **1** at RT. Mo anode was used as X-ray resource. The power is 3 W (50 kV, 60  $\mu$ A) in red solid line and 5 W (50 kV, 100  $\mu$ A) in blue solid line.

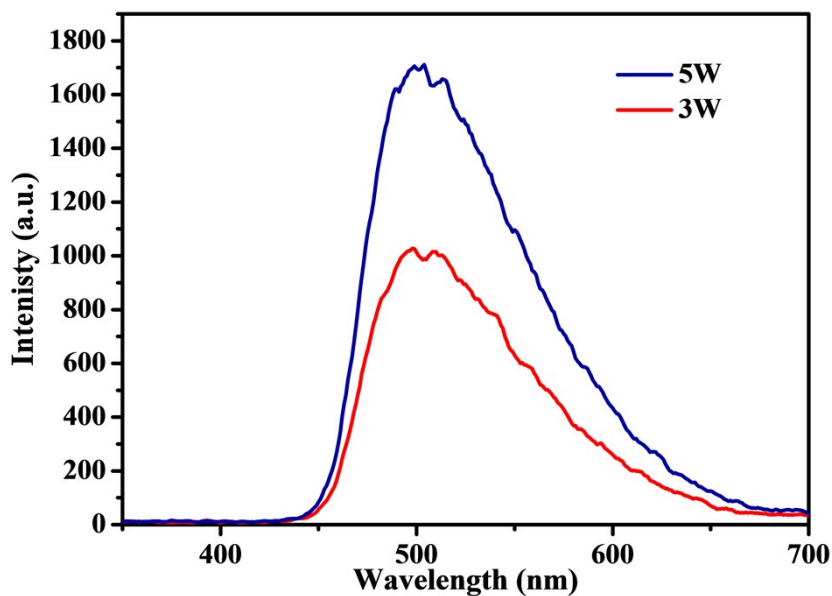

**Fig. S21** X-ray excited PL spectra of **2** at RT. Mo anode was used as X-ray resource. The power is 3 W (50 kV, 60  $\mu$ A) in red solid line and 5 W (50 kV, 100  $\mu$ A) in blue solid line.
